# Supplementary material
Source: Springer Nature journal article supplement (https://www.springermedizin.de/resource/supplementary/12950_2011_200_MOESM3_ESM.pdf/9558186)

# LEAN

# OBESE

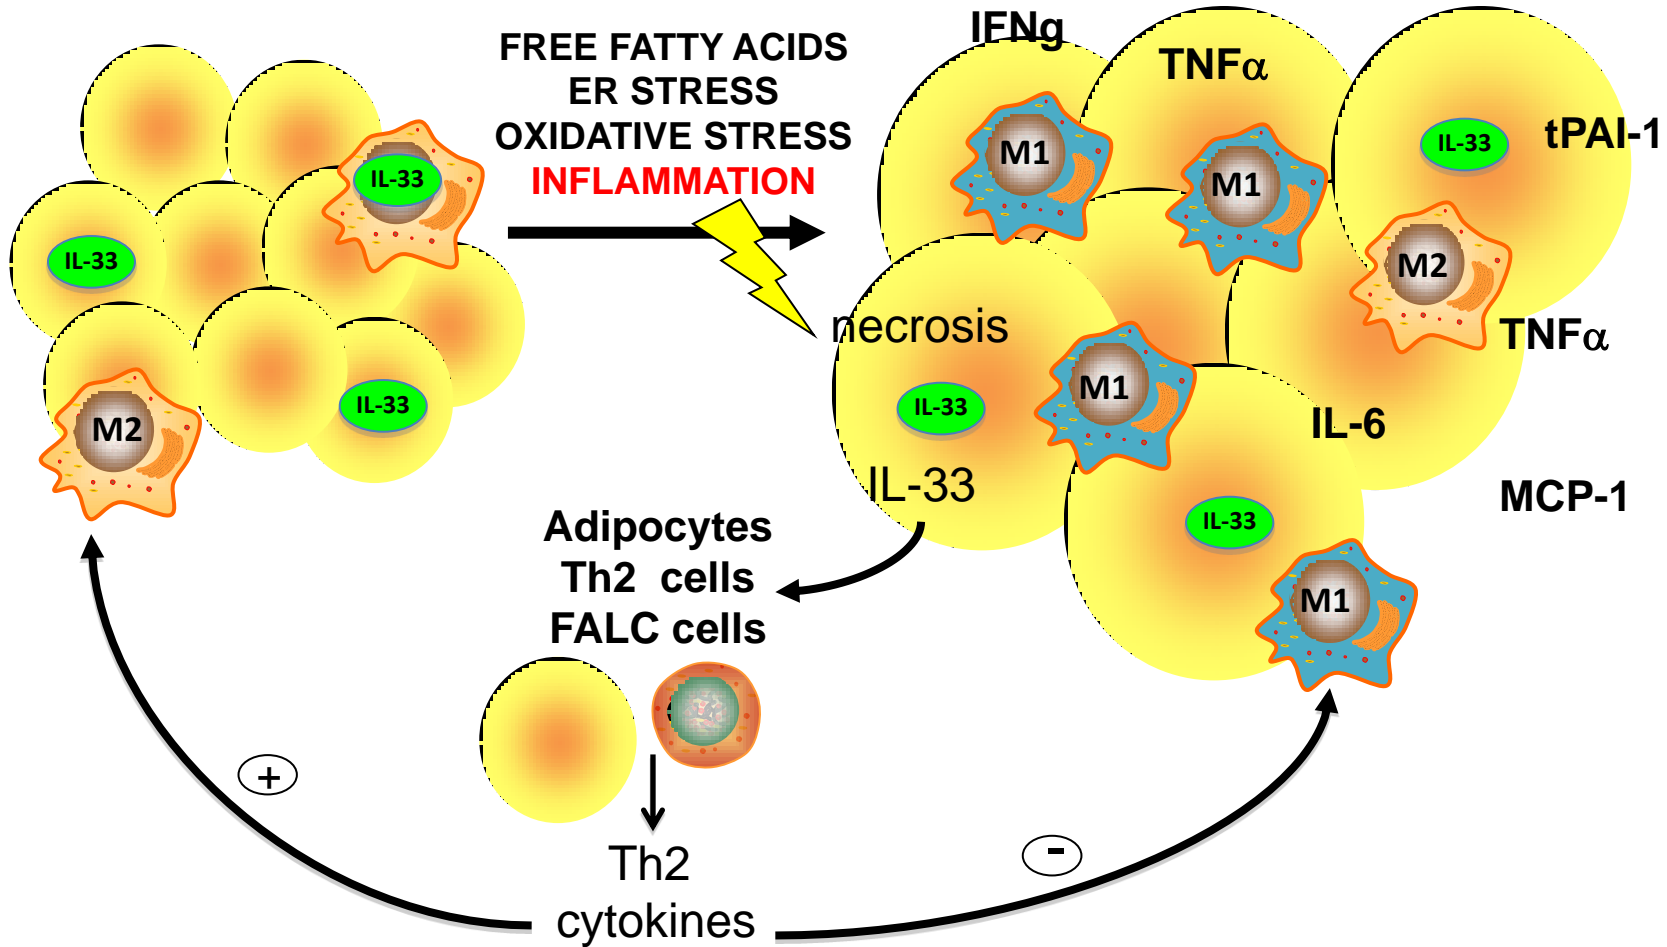

Supplement: MOESM3 [file 9558186]
